# Supplementary material
Source: PubMed Central journal article supplement (PMC7483329)
Supplement: NIHMS1592149-supplement-Supp_Table_1.pdf [file NIHMS1592149-supplement-Supp_Table_1.pdf]

**Supplemental Table 1.** Participant characteristics at diagnosis by different groups of Canary PASS participants with and without an MRI.

|                               | <b>PASS participants with no MRI</b> | <b>Participants diagnosed after MRI introduced that have no MRI</b> | <b>Participants with at least one MRI</b> | <b>Participants with MRI and included in analysis</b> |
|-------------------------------|--------------------------------------|---------------------------------------------------------------------|-------------------------------------------|-------------------------------------------------------|
| <b>N Individuals</b>          | 1141                                 | 504                                                                 | 699                                       | 361                                                   |
| <b>Race</b>                   |                                      |                                                                     |                                           |                                                       |
| Caucasian                     | 1006 (88%)                           | 439 (87%)                                                           | 603 (86%)                                 | 306 (85%)                                             |
| African American              | 80 (7%)                              | 34 (7%)                                                             | 45 (6%)                                   | 25 (7%)                                               |
| Other                         | 55 (5%)                              | 31 (6%)                                                             | 51 (7%)                                   | 30 (8%)                                               |
| <b>Age (yrs)</b>              | 63 (58-68)                           | 63 (58-68)                                                          | 62 (58-67)                                | 62 (57-66)                                            |
| <b>BMI (kg/m<sup>2</sup>)</b> | 27.5 (25.1-30.6)                     | 28 (25.5-31.4)                                                      | 27.2 (25-30)                              | 27.3 (25-30.1)                                        |
| <b>PSA</b>                    | 5 (4-6.5)                            | 5.2 (4.1-6.6)                                                       | 5.2 (4-7)                                 | 5.1 (4-7)                                             |
| <b>Prostate Size*</b>         | 42 (30.8-56.9)                       | 43.5 (32.6-60)                                                      | 44 (33-59.4)                              | 43.9 (32-60.5)                                        |
| <b>PSA Density*</b>           | 0.11 (0.08-0.16)                     | 0.11 (0.08-0.16)                                                    | 0.12 (0.08-0.16)                          | 0.12 (0.08-0.16)                                      |
| <b>% Positive Cores**</b>     | 10 (8.3-16.7)                        | 12.5 (8.3-16.7)                                                     | 10 (8.3-18.5)                             | 10 (8.3-16.7)                                         |

Categorical variables shown as N (%), and continuous variables summarized as median (IQR).

\* 2 (<1%) individual had missing data in prostate size in the group with MRI

\*\* 8 (1%) and 30 (3%) individuals had missing data in ratio positive / total biopsy cores in the group with and without MRI respectively.
