# Supplementary material
Source: PubMed Central journal article supplement (PMC7483329)
Supplement: NIHMS1592149-supplement-Supp_Table_2.pdf [file NIHMS1592149-supplement-Supp_Table_2.pdf]

**Supplemental Table 2.** MRI PIRADS association with Gleason upgrading. Results are shown by dichotomous PIRADS (1-3 vs 4-5) and GG in a 2x2 table. The NPV and PPV were 82% (95% CI: 77-88%) and 37% (95% CI: 31-44%) respectively, while the FPR and TPR were 43% (95% CI: 38-49%) and 68% (95% CI: 58-77%) respectively.

|                | No Gleason pattern 4 | Gleason pattern $\geq 4$ | Total |
|----------------|----------------------|--------------------------|-------|
| MRI PIRADS 1-3 | 163                  | 35                       | 198   |
| MRI PIRADS 4-5 | 124                  | 73                       | 197   |
| Total          | 287                  | 108                      | 395   |
