# Supplementary material
Source: PubMed Central journal article supplement (PMC7483329)

Supplementary Figure 1

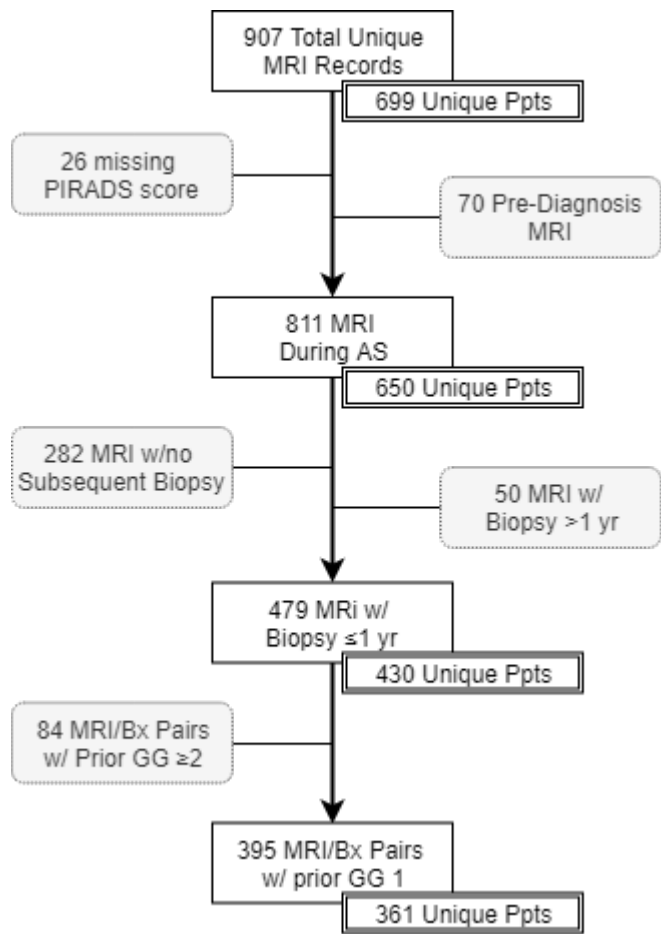

Supplement: NIHMS1592149-supplement-Supp_Figure_1.pdf [file NIHMS1592149-supplement-Supp_Figure_1.pdf]
